# Supplementary material
Source: publisher figshare collection journal article supplement (https://gsajournals.figshare.com/ndownloader/files/13477472)
Supplement: Supplementary file 1 [file 13477472]

## Sheet: BiFC positives
Table S4-1. Positives from BiFC-based screen with VC-Rho5
Gene	ORF
ACB1	YGR037C
AHP1	YLR109W
ATG21	YPL100W
BAP2	YBR068C
CDC10	YCR002C
CDC19	YAL038W
CPR1	YDR155C
CRP1	YHR146W
CWP1	YKL096W
CYS4	YGR155W
DBF20	YPR111W
ENO2	YHR174W
ERG6	YML008C
FBA1	YKL060C
GLY1	YEL046C
GPM1	YKL152C
HNM1	YGL077C
HXK2	YGL253W
HXT1	YHR094C
HXT3	YDR345C
ITR1	YDR497C
LSP1	YPL004C
MID2	YLR332W
MSP1	YGR028W
NCE102	YPR149W
PDC5	YLR134W
PGK1	YCR012W
PMP3	YDR276C
RHR2	YIL053W
RPL8A	YHL033C
RPS6A	YPL090C
RTN1	YDR233C
SEC14	YMR079W
SHM2	YLR058C
STE24	YJR117W
SUR7	YML052W
TDH2	YJR009C
TDH3	YGR192C
TMA19	YKL056C
TPI1	YDR050C
TPO4	YOR273C
VHT1	YGR065C
VMA10	YHR039C-A
VMA4	YOR332W

## Sheet: FunctionalAnnotationChart_BiFCs
Table S4-2. Functional Annotation Clustering of positives from BiFC-screen by DAVID analysis
	Category	Term	davidID	Pathway	Count	X.	PValue	Genes	List.Total	Pop.Hits	Pop.Total	Fold.Enrichment	Bonferroni	Benjamini	FDR
2	GOTERM_BP_DIRECT	GO:0006096~glycolytic process	GO:0006096	glycolytic process	12	0.972447	1.62e-16	TPI1, CDC19, GPM1, FBA1, HXK2, PGK1	42	34	5681	47.7395	6.22e-15	6.22e-15	1.11e-13
3	KEGG_PATHWAY	cal01130:Biosynthesis of antibiotics	cal01130	Biosynthesis of antibiotics	20	1.62075	2.71e-12	STE24, TPI1, ERG6, CDC19, GPM1, FBA1, HXK2, SHM2, PGK1, CYS4	28	372	3037	5.83141	7.31e-11	7.31e-11	2.24e-09
4	KEGG_PATHWAY	cal00010:Glycolysis / Gluconeogenesis	cal00010	Glycolysis / Gluconeogenesis	12	0.972447	2.25e-11	TPI1, CDC19, GPM1, FBA1, HXK2, PGK1	28	81	3037	16.0688	6.07e-10	3.04e-10	1.86e-08
5	KEGG_PATHWAY	cal01200:Carbon metabolism	cal01200	Carbon metabolism	15	1.21556	5.14e-11	TPI1, CDC19, GPM1, FBA1, HXK2, SHM2, PGK1, CYS4	28	183	3037	8.89052	1.39e-09	4.63e-10	4.26e-08
9	KEGG_PATHWAY	cal01230:Biosynthesis of amino acids	cal01230	Biosynthesis of amino acids	14	1.13452	2.82e-09	TPI1, CDC19, GPM1, FBA1, SHM2, PGK1, CYS4	28	201	3037	7.55473	7.6e-08	1.9e-08	2.33e-06
12	KEGG_PATHWAY	cal01110:Biosynthesis of secondary metabolites	cal01110	Biosynthesis of secondary metabolites	17	1.37763	5.15e-07	TPI1, ERG6, CDC19, GPM1, FBA1, HXK2, SHM2, PGK1, CYS4	28	500	3037	3.68779	1.39e-05	2.78e-06	0.00042697
13	KEGG_PATHWAY	cal01100:Metabolic pathways	cal01100	Metabolic pathways	24	1.94489	5.88e-07	TPI1, RHR2, VMA4, ERG6, CDC19, GPM1, FBA1, HXK2, VMA10, SHM2, PGK1, CYS4	28	1157	3037	2.24991	1.59e-05	2.65e-06	0.000487396
16	KEGG_PATHWAY	cal00051:Fructose and mannose metabolism	cal00051	Fructose and mannose metabolism	6	0.486224	5.46e-06	TPI1, FBA1, HXK2	28	31	3037	20.9931	0.000147368	2.11e-05	0.00452215
19	KEGG_PATHWAY	cal00680:Methane metabolism	cal00680	Methane metabolism	6	0.486224	3.6e-05	GPM1, FBA1, SHM2	28	45	3037	14.4619	0.000972734	0.000121643	0.029858
28	KEGG_PATHWAY	cal00260:Glycine	serine and threonine metabolism	serine and threonine metabolism	5	0.405186	0.00245155	GPM1, SHM2, CYS4	28	66	3037	8.21699	0.0641248	0.00733664	2.01302
7	GOTERM_CC_DIRECT	GO:0030446~hyphal cell wall	GO:0030446	hyphal cell wall	10	0.810373	1.76e-09	TPI1, CDC19, GPM1, FBA1, PGK1	45	84	6961	18.4153	4.58e-08	4.58e-08	1.45e-06
8	GOTERM_BP_DIRECT	GO:0044416~induction by symbiont of host defense response	GO:0044416	induction by symbiont of host defense response	8	0.648298	2.22e-09	TPI1, CDC19, FBA1, PGK1	42	33	5681	32.7908	1.24e-07	6.21e-08	2.19e-06
10	GOTERM_BP_DIRECT	GO:0051701~interaction with host	GO:0051701	interaction with host	6	0.486224	8.84e-08	GPM1, FBA1, PGK1	42	17	5681	47.7395	4.95e-06	1.65e-06	8.73e-05
11	GOTERM_CC_DIRECT	GO:0009986~cell surface	GO:0009986	cell surface	10	0.810373	3.29e-07	TPI1, CDC19, GPM1, FBA1, PGK1	45	152	6961	10.1769	8.55e-06	4.27e-06	0.000269596
14	GOTERM_CC_DIRECT	GO:0009277~fungal-type cell wall	GO:0009277	fungal-type cell wall	8	0.648298	3.3e-06	TPI1, GPM1, FBA1, PGK1	45	104	6961	11.8991	8.58e-05	2.86e-05	0.00270695
17	GOTERM_CC_DIRECT	GO:0005886~plasma membrane	GO:0005886	plasma membrane	14	1.13452	5.96e-06	ERG6, CDC19, ITR1, FBA1, PGK1, SUR7, NCE102	45	489	6961	4.42872	0.000154871	3.1e-05	0.00488511
34	GOTERM_CC_DIRECT	GO:0030445~yeast-form cell wall	GO:0030445	yeast-form cell wall	4	0.324149	0.00960686	CDC19, PGK1	45	70	6961	8.83937	0.221967	0.0352199	7.61122
68	GOTERM_CC_DIRECT	GO:0009897~external side of plasma membrane	GO:0009897	external side of plasma membrane	2	0.162075	0.0126028	PGK1	45	2	6961	154.689	0.2809	0.0403815	9.87834
15	GOTERM_CC_DIRECT	GO:0032126~eisosome	GO:0032126	eisosome	4	0.324149	4.65e-06	SUR7, NCE102	45	6	6961	103.126	0.000120935	3.02e-05	0.00381462
18	GOTERM_CC_DIRECT	GO:0005737~cytoplasm	GO:0005737	cytoplasm	15	1.21556	2.26e-05	TPI1, CDC19, GPM1, FBA1, HXK2, SHM2, PGK1, CYS4	45	640	6961	3.62552	0.000587413	9.79e-05	0.0185316
24	GOTERM_BP_DIRECT	GO:0015031~protein transport	GO:0015031	protein transport	6	0.486224	0.00169823	ATG21, NCE102, SEC14	42	122	5681	6.65222	0.0907921	0.0235145	1.66431
67	GOTERM_CC_DIRECT	GO:0033178~proton-transporting two-sector ATPase complex	catalytic domain	proton-transporting two-sector ATPase complex	2	0.162075	0.0126028	VMA4	45	2	6961	154.689	0.2809	0.0403815	9.87834
69	GOTERM_CC_DIRECT	GO:0016471~vacuolar proton-transporting V-type ATPase complex	GO:0016471	vacuolar proton-transporting V-type ATPase complex	2	0.162075	0.0126028	VMA10	45	2	6961	154.689	0.2809	0.0403815	9.87834
70	KEGG_PATHWAY	cal04145:Phagosome	cal04145	Phagosome	4	0.324149	0.0126981	VMA4, VMA10	28	56	3037	7.74745	0.29181	0.0339158	10.0463
